# Supplementary material
Source: Springer Nature journal article supplement (https://www.springermedizin.de/resource/supplementary/13002_2007_115_MOESM4_ESM.pdf/9627188)

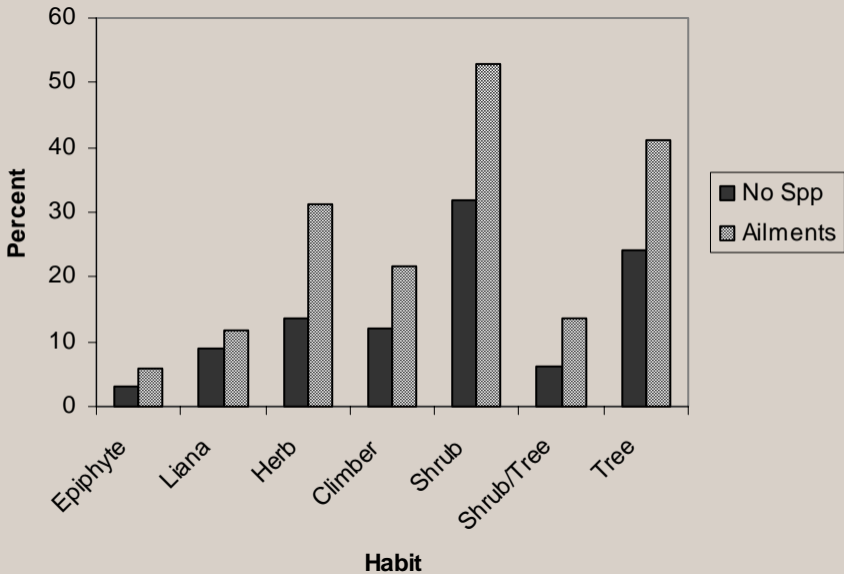

Supplement: MOESM4 [file 9627188]
